# Supplementary material for: Immunosuppressive Yersinia Effector YopM Binds DEAD Box Helicase DDX3 to Control Ribosomal S6 Kinase in the Nucleus of Host Cells
Source: PubMed Central journal article supplement (PMC4907486; doi:10.1371/journal.ppat.1005660), 2016-06-14
Supplement: ppat.1005660.s007.pdf [file ppat.1005660.s007.pdf]

**S2 Table. Stereochemical and refinement parameters of the YopM\_34-481 crystal**

|                                       | YopM_34-481                                      |
|---------------------------------------|--------------------------------------------------|
| Space group                           | C2                                               |
| a (Å)                                 | 210.9                                            |
| b (Å)                                 | 126.3                                            |
| c (Å)                                 | 139.9                                            |
| $\alpha$ (°)                          | 90                                               |
| $\beta$ (°)                           | 118.3                                            |
| $\gamma$ (°)                          | 90                                               |
| $V_M$ (Å <sup>3</sup> /Da)            | 4.1 assuming two dimers per asymmetric unit (AU) |
| Solvent content (%)                   | 69.8                                             |
| Resolution (Å)                        | 40-3.2 (3.283 – 3.2)                             |
| No. of total reflections              | 335667                                           |
| Redundancy                            | 6.6 (5.9)                                        |
| Completeness of data (%)              | 99.6 (99.3)                                      |
| Average I/sigma Intensity             | 11.9 (3.3)                                       |
| No. of reflections used in refinement | 50515                                            |
| $R_{\text{merge}}$ (%) <sup>a</sup>   | 9.1 (50.5)                                       |
| $R_{\text{work}}$ (%) <sup>b</sup>    | 18.1 (29.3)                                      |
| $R_{\text{free}}$ (%) <sup>c</sup>    | 20.1 (28.9)                                      |
| Protein atoms                         | 14167                                            |
| Solvent atoms                         | 59                                               |
| Mean B value (Å <sup>2</sup> ):       | 101.7                                            |
| Root mean square deviation:           |                                                  |
| Bonds (Å)                             | 0.006                                            |
| Bond angels (°)                       | 1.234                                            |

<sup>a</sup> $R_{\text{merge}}$  is defined as  $\sum_{hkl} \sum_i |I_i(hkl) - [I(hkl)]| / \sum_{hkl} \sum_i I_i(hkl)$ , where  $I_i(hkl)$  is the intensity of an individual measurement and  $[I(hkl)]$  is the mean intensity from multiple observations of this reflection.

<sup>b</sup> $R_{\text{work}} = \sum |F_{\text{obs}}| - |F_{\text{calc}}| / \sum |F_{\text{obs}}|$ , where  $F_{\text{obs}}$  and  $F_{\text{calc}}$  are observed and calculated structure factors.

<sup>c</sup> $R_{\text{free}}$  was calculated using a randomly selected 5% of the reflections.
