# Supplementary material for: Immunosuppressive Yersinia Effector YopM Binds DEAD Box Helicase DDX3 to Control Ribosomal S6 Kinase in the Nucleus of Host Cells
Source: PubMed Central journal article supplement (PMC4907486; doi:10.1371/journal.ppat.1005660), 2016-06-14
Supplement: ppat.1005660.s008.pdf [file ppat.1005660.s008.pdf]

**S3 Table. SAXS data collection and derived parameters**

| <b>Data collection parameters</b>     |                                               |                    |                |
|---------------------------------------|-----------------------------------------------|--------------------|----------------|
| Instrument                            | EMBL beamline P12                             |                    |                |
| Wavelength (Å)                        | 1.5                                           |                    |                |
| S range (Å <sup>-1</sup> )            | 0.004–0.45                                    |                    |                |
| Exposure time (s)                     | 20×0.05                                       |                    |                |
| Concentration range (mg/ml)           | 0.7–10.4                                      |                    |                |
| Temperature (K)                       | 283                                           |                    |                |
| <b>Structural parameters</b>          | <b>DDX3_51-418</b>                            | <b>YopM_34-481</b> | <b>Complex</b> |
| R <sub>g</sub> (Å) (from Guinier)     | 28±2                                          | 39±1               | 40±1           |
| R <sub>g</sub> (Å) (from p(r))        | 29±3                                          | 39±4               | 40±4           |
| D <sub>max</sub> (Å)                  | 120±12                                        | 115±12             | 150±15         |
| <b>Molecular weight determination</b> |                                               |                    |                |
| MW (kDa) from Porod volume            | 50±5                                          | 96±10              | 119±12         |
| MW (kDa) from DAMMIF                  | 47±5                                          | 108±11             | 123±12         |
| Calculated MW (kDa) from sequence     | 41.5                                          | 100.5              | 142.0          |
| <b>Software employed</b>              |                                               |                    |                |
| Primary data reduction and processing | Automated SAXS data analysis pipeline SASFLOW |                    |                |
| Ab initio analysis                    | DAMMIF, GASBOR                                |                    |                |
| Rigid-body modelling                  | SASREF                                        |                    |                |
| Computation of model intensities      | CRY SOL                                       |                    |                |
| 3-d graphics representation           | Pymol                                         |                    |                |
