# Supplementary material for: Immunosuppressive Yersinia Effector YopM Binds DEAD Box Helicase DDX3 to Control Ribosomal S6 Kinase in the Nucleus of Host Cells
Source: PubMed Central journal article supplement (PMC4907486; doi:10.1371/journal.ppat.1005660), 2016-06-14
Supplement: ppat.1005660.s009.pdf [file ppat.1005660.s009.pdf]

**S4 Table. Intermolecular hydrogen bonds and salt bridges within the YopM\_34-481 dimer**

|    | <b>Monomer 1</b> | <b>Dist. [Å]</b> | <b>Monomer 2</b> |
|----|------------------|------------------|------------------|
| 1  | ARG 479[ NH2]    | 3.03             | ASP 399[ OD1]    |
| 2  | ARG 479[ NH2]    | 2.94             | ASP 399[ OD2]    |
| 3  | ARG 479[ NH1]    | 2.99             | SER 401[ OG ]    |
| 4  | ARG 479[ NH2]    | 2.76             | SER 401[ OG ]    |
| 5  | ARG 479[ NH2]    | 3.30             | ASP 419[ OD2]    |
| 6  | ARG 361[ NH2]    | 2.52             | GLU 461[ OE2]    |
| 7  | ARG 342[ NH1]    | 3.35             | LEU 478[ O ]     |
| 8  | ARG 402[ NH2]    | 3.11             | ASP 481[ O ]     |
| 9  | ASP 399[ OD1]    | 3.15             | ARG 479[ NH2]    |
| 10 | ASP 399[ OD2]    | 3.13             | ARG 479[ NH2]    |
| 11 | SER 401[ OG ]    | 2.53             | ARG 479[ NH2]    |
| 12 | ASP 419[ OD2]    | 3.54             | ARG 479[ NH2]    |
| 13 | ASP 422[ OD2]    | 3.19             | HIS 462[ NE2]    |
| 14 | GLU 461[ OE2]    | 2.30             | ARG 361[ NH2]    |
| 15 | MET 480[ O ]     | 3.52             | ARG 361[ NH1]    |
| 16 | ASP 481[ OD1]    | 3.35             | ARG 402[ NH1]    |
| 17 | ASP 481[ OD1]    | 3.27             | ARG 402[ NH2]    |
| 18 | HIS 462[ NE2]    | 3.30             | ASP 422[ OD2]    |
| 19 | ARG 402[ NE ]    | 3.01             | GLU 461[ OE2]    |
| 20 | LYS 362[ NZ ]    | 3.14             | ASP 481[ OD2]    |
| 21 | GLU 461[ OE2]    | 3.22             | ARG 402[ NH1]    |
