# Supplementary material for: Immunosuppressive Yersinia Effector YopM Binds DEAD Box Helicase DDX3 to Control Ribosomal S6 Kinase in the Nucleus of Host Cells
Source: PubMed Central journal article supplement (PMC4907486; doi:10.1371/journal.ppat.1005660), 2016-06-14
Supplement: ppat.1005660.s010.pdf [file ppat.1005660.s010.pdf]

**S5 Table. DEGs in human macrophages infected with WA314ΔYopM vs. WA314 for 1.5 h**

| EntrezGene ID | Associated Gene Name | Description                            | log2-fold change | padj    |
|---------------|----------------------|----------------------------------------|------------------|---------|
| 9034          | CCRL2                | chemokine (C-C motif) receptor-like 2  | -1.0339          | 0.00049 |
| 3280          | HES1                 | hes family bHLH transcription factor 1 | -1.7165          | 0.00292 |
| 1961          | EGR4                 | early growth response 4                | -2.111           | 0.00683 |
| 51561         | IL23A                | interleukin 23, alpha subunit p19      | -3.04634         | 0.02647 |
| 165904        | XIRP1                | xin actin-binding repeat containing 1  | -3.16580         | 0.02647 |
| 3586          | IL10                 | interleukin 10                         | -1.84863         | 0.034   |

**S5 Table:** Duplicates (two different donors) of primary human macrophages were infected with *Y. enterocolitica* WA314 or -WA314ΔYopM for 1.5 h. Total RNA was prepared from each sample and subjected to RNA-seq. Mean of the duplicates was formed and differentially expressed genes (DEGs) ( $\log_2$ -fold change  $\geq 1$  and  $p \leq 0.05$ ) in WA314ΔYopM vs. WA314 infected macrophages were determined. padj; adjusted p-value.
