# Supplementary material for: Immunosuppressive Yersinia Effector YopM Binds DEAD Box Helicase DDX3 to Control Ribosomal S6 Kinase in the Nucleus of Host Cells
Source: PubMed Central journal article supplement (PMC4907486; doi:10.1371/journal.ppat.1005660), 2016-06-14
Supplement: ppat.1005660.s011.pdf [file ppat.1005660.s011.pdf]

**S6 Table. KEGG pathway analysis of downregulated DEGs in WA314ΔYopM- vs. WA314 infected human macrophages at 1.5 h post infection**

| KEGG term (number of genes in the gene set) | EntrezGene IDs  | Statistics                          |
|---------------------------------------------|-----------------|-------------------------------------|
| Cytokine-cytokine receptor interaction (3)  | 3586 51561 1236 | C=244; E=0.12; R=25.96; adjP=0.0004 |
| Jak-STAT signaling pathway (2)              | 3586 51561      | C=139; E=0.07; R=30.38; adjP=0.0018 |

**S6 Table:** Kyoto Encyclopedia of Genes and Genomes (KEGG) pathway analysis of DEGs was performed using WebGestalt. The names/terms of the enriched KEGG pathways, the number of genes in the gene set of the respective pathway, the respective EntrezGeneIDs and the statistics for the enriched pathway are listed. C: number of reference genes in the category; E: expected number in the category; R: ratio of enrichment and adjP: p value adjusted by the multiple test adjustment.
