# Supplementary material for: Immunosuppressive Yersinia Effector YopM Binds DEAD Box Helicase DDX3 to Control Ribosomal S6 Kinase in the Nucleus of Host Cells
Source: PubMed Central journal article supplement (PMC4907486; doi:10.1371/journal.ppat.1005660), 2016-06-14
Supplement: ppat.1005660.s013.pdf [file ppat.1005660.s013.pdf]

**S8 Table. Plasmids designed in this study**

| Vector                                                                       | Insert                                                                                       | Primer                                                                                                                                            | Resulting Plasmid        |
|------------------------------------------------------------------------------|----------------------------------------------------------------------------------------------|---------------------------------------------------------------------------------------------------------------------------------------------------|--------------------------|
| pGEX-4T2 (GE-Healthcare, Munich, Germany),                                   | <i>yopM</i> full length (aa1-506)                                                            | YopM-for 5'-CTGGGATCCTTTATAAATCCAAGA-3'<br>pGEX-YopM-rev 5'-GCCGAATTCCTACTCAAAACATCATC-3                                                          | pGEX-4T2-YopM            |
| pET302 (Thermo fisher scientific Waltham, USA, 6x-N-terminal (NT)- HIS tag   | <i>yopM</i> full length (aa1-506) and recognition site for tobacco etch virus protease (TEV) | tev-YopM-for 5'-CGTGAATTCGGAGAATCTTATTTTCAGGGCTTTATAAATCCAAGAAATGTA-3'<br>tev-YopM-rev 5'-ATTTCGGATCCCTACTCAAAAACATCATCTTCAAG-3'                  | 6xNT-His-TEV-YopM        |
| pET302, 6x-NT- HIS tag                                                       | <i>yopM</i> aa34-481 and TEV- recognition site                                               | tev-YopM_34-for 5'-CGTGAATTCGGAGAATCTTATTTTCAGGGCAAATCTAAGACTGAATATTATAATGCA-3'<br>tev-YopM_34-481-rev 5'-ATTTCGGATCCTTAGTCCATCCGAAGATCTTCCAC -3' | 6xNT-His-TEV-YopM_34-481 |
| pCS2+MT (XB-VEC12442480), [1], myc tag                                       | <i>yopM</i> full length (aa1-506)                                                            | YopM-NCOI-for 5'-ACCATGGTTATGTTTATAAATCCAAG-3'<br>YopM-XHOI-rev 5'-GTCAAAGCTTATGTATGGTTTTGTGGTCAATGAA-3'                                          | myc-YopM                 |
| pCS2+MT, myc tag                                                             | <i>yopM</i> (aa1-481)                                                                        | YopM-NCOI-for 5'-ACCATGGTTATGTTTATAAATCCAAG-3<br>YopM_481-XHOI-rev 5'-GTCACCTCGAGCTAGTCCATCCGAAGATC-3'                                            | myc-YopM_1-481           |
| pEBG2T, [3] GST-tag                                                          | <i>yopM</i> full length (aa1-506)                                                            | derived from myc-YopM and ligated into pEBG2T via restriction-sites BAMHI and NOTI                                                                | myc-GST-YopM             |
| pET303 (Thermo fisher scientific, Waltham, USA), 6x-C-terminal (CT)- HIS tag | <i>ddx3</i> full length aa1-662                                                              | DDX3-for 5'-GAGGTCTAGAATGAGTCA TGTGGCAGTGG-3'<br>DDX3-rev 5'-TACCCTCGAGGTTACCCC ACCAGTC-3'                                                        | His-DDX3                 |

|                                                         |                                   |                                                                                                                                                             |                   |
|---------------------------------------------------------|-----------------------------------|-------------------------------------------------------------------------------------------------------------------------------------------------------------|-------------------|
| pET303, 6x-C-CT- HIS tag                                | <i>ddx3</i> (aa1-418)             | DDX3-for 5'-GAGGTCTAGAATGAGTCA TGTGGCAGTGG-3'<br>DDX3_418-rev 5'-TACCCTCGAGTTTCTGTGT GA TGTTTTTC-3'.                                                        | His-DDX3_1-418    |
| pET303, 6x-CT- HIS tag                                  | <i>ddx3</i> (aa51-418)            | DDX3_51for 5'- GAGGTCT AGAATGGGTTTCTACGAT AAAGAC-3'<br>DDX3_418-rev 5'-TACCCTCGAGTTTCTGTGT GA TGTTTTTC-3'.                                                  | His-DDX3_51-418   |
| pET303, 6x-CT- HIS tag                                  | <i>ddx3</i> (aa101-418)           | DDX3_101-for 5'-GAGGTCTAGAATGCGGAG TGATTACGATGGC-3'<br>DDX3_418-rev 5'-TACCCTCGAGTTTCTGTGT GA TGTTTTTC-3'.                                                  | His-DDX3_101-418  |
| pET303, 6x-CT- HIS tag                                  | <i>ddx3</i> (aa168-418)           | DDX3_168-for 5'-GAGGTCTAGAATGGTT GAGGCAACAGGCAAC-3'<br>DDX3_418-rev 5'-TACCCTCGAGTTTCTGTGT GA TGTTTTTC-3'.                                                  | DDX3_168-418      |
| pET303, 6x-CT- HIS tag                                  | <i>ddx3</i> (aa201-418)           | DDX3_201-for 5'-GAGGTCTAGAATGACTCG CCCAACTCCAGTG-3'<br>DDX3_418-rev 5'-TACCCTCGAGTTTCTGTGT GA TGTTTTTC-3'.                                                  | His-DDX3_201-418  |
| pCDNA 3.1(+)<br>(Thermo fisher scientific Waltham, USA) | <i>ddx3</i> full length (aa1-662) | DDX3-HINDIII-for 5'-CA AGCTTATGAGTCATGTGG CAGTGGAAAAT-3'<br>DDX3_662-HA-BAMHI-rev 5'-AGGATCCTCAAGCGT AATCTGGAACATCGTATG GTACATGTTACCCCACC AGTCAACC-3'       | DDX3-HA           |
| pCDNA 3.1(+)                                            | <i>ddx3</i> (aa1-418)             | DDX3-HINDIII-for 5'-CA AGCTTATGAGTCATGTGG CAGTGGAAAAT-3'<br>DDX3_1-418-HA-BAMHI-rev 5'-GGATCCTCAAGCGTA ATCTGGAACATCGTATGG GTACATTTTCTGTGTGATG TTTTCAGAGGT-3 | DDX3-HA aa1-418   |
| pCDNA 3.1(+)                                            | <i>ddx3</i> aa418-662             | DDX3_418-602-for 5'-CAAGCTTACCATGGTAGT TTGGGTGGAAGA-3'<br>DDX3_662-HA-BAMHI-rev 5'-AGGATCCTCAAGCGT AATCTGGAACATCGTATG GTACATGTTACCCCACC AGTCAACC-3'         | DDX3-HA aa418-662 |

|               |                                                                                                              |                                                                                                                                                 |                      |
|---------------|--------------------------------------------------------------------------------------------------------------|-------------------------------------------------------------------------------------------------------------------------------------------------|----------------------|
| pCDNA 3.1(+)  | <i>ddx3</i> full length aa1-662                                                                              | DDX3-for 5'-CAAGCTTACCATGAGTCA TGTGGCAGTG-3'<br>DDX3-flag-BAMHI-rev 5'-AGGATCCTCACTTATCGT CGTCATCCTTGTAATCCAT GTTACCCCACCAGTCAAC C-3'           | DDX3-flag            |
| pCDNA 3.1(+)  | <i>ddx3</i> full length aa1-662 with defect in ATPase- Helicase- activity obtained by mutation of aa K230E   | DDX3_K230E-for 5'-GCCCAAACAGGGTCTGGA GAGACTGCAGCATTTCTG T TT-3'<br>DDX3_K230E-rev 5'-AACAGAAATGCTGCTGCA GTCTCTCCAG ACCCTGTTTGGGC -3'            | DDX3K230E-HA         |
| pCDNA 3.1(+)  | <i>ddx3</i> full-length aa1-662 with two silent mutations resulting in resistance to DDX3 against siRNA no 3 | siRNA3-DDX3-mutKit-for 5'-ATCATGGGAAACAT CGAGCTTACACGTTATAC TCGCCA-3'<br>siRNA3-DDX3-mutKit-rev :5'TGGGCGAGTATAACGT GTAAGCTCGATGTTTCCC ATGAT-3' | rDDX3-HA             |
| pACYC 184 [4] | <i>yopM</i> (aa1-481)                                                                                        | YopM_481-XHOI-rev 5'-GTCACTCGAGCTAGTCCA TCCGAAGATC-3'<br>YopM -F-hind 5'-GTCAAAGCTTATGTATGG TTTTGTGCAATGAA-3'                                   | pACYC 184_YopM_1-481 |

### **References Supplemental Information**

1. Hentschke M, Berneking L, Belmar Campos C, Buck F, Ruckdeschel K, Aepfelbacher M. Yersinia virulence factor YopM induces sustained RSK activation by interfering with dephosphorylation. PloS one. 2010;5(10).
3. Dettori R, Sonzogni S, Meyer L, Lopez-Garcia LA, Morrice NA, Zeuzem S, et al. Regulation of the interaction between protein kinase C-related protein kinase 2 (PRK2) and its upstream kinase, 3-phosphoinositide-dependent protein kinase 1 (PDK1). The Journal of biological chemistry. 2009;284(44):30318-27.
4. Chang AC, Cohen SN. Construction and characterization of amplifiable multicopy DNA cloning vehicles derived from the P15A cryptic miniplasmid. J Bacteriol. 1978;134(3):1141-56.
